# Supplementary material for: A novel molecularly imprinted polymer thin film at surface of ZnO nanorods for selective fluorescence detection of para-nitrophenol
Source: Royal Society of Chemistry journal article supplement (doi:10.1039/c5ra05093f), 2015-01-01
Supplement: c5ra05093f1.pdf [file c5ra05093f1.pdf]

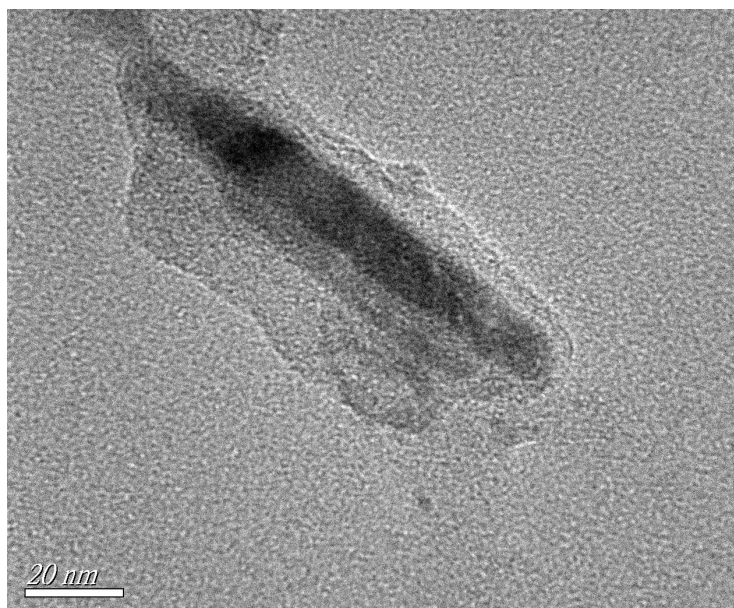

Figure S1 TEM images of MIPs-ZnO nanorods by different amount of monomers (0.3 mmol of MAA and 1.2 mmol of EGDMA)

Table S1 The sizes of ZnO NRs (36 h), ZnO NRs (72 h) and MIPs-ZnO NRs obtained from TEM

|          | ZnO NRs (36 h) | ZnO NRs (72 h) | MIPs-ZnO NRs |
|----------|----------------|----------------|--------------|
| length   | 16-32 nm       | 80-100 nm      | 82-103 nm    |
| diameter | 8-12 nm        | 8.5-12.5 nm    | 10-14 nm     |
